# Supplementary material for: In silico design of single transition metal atom anchored defective boron carbide monolayers as high-performance electrocatalysts for the nitrogen reduction reaction
Source: Royal Society of Chemistry journal article supplement (doi:10.1039/d2nr02796h), 2022-01-01
Supplement: d2nr02796h1.pdf [file d2nr02796h1.pdf]

## Supplementary Information for

### In Silico Design of Single Transition Metal Atom Anchored Defective Boron Carbide Monolayer as High-performance Electrocatalysts for the Nitrogen Reduction Reaction

Jianxin Ou,<sup>a</sup> Xuxin Kang<sup>a</sup> and Xiangmei Duan<sup>\*a,b</sup>

<sup>a</sup>School of Physical Science and Technology, Ningbo University, Ningbo, 315211,

China

<sup>b</sup>Laboratory of Clean Energy Storage and Conversion, Ningbo University, Ningbo,

China

\*Corresponding authors.

E-mail address: [duanxiangmei@nbu.edu.cn](mailto:duanxiangmei@nbu.edu.cn)

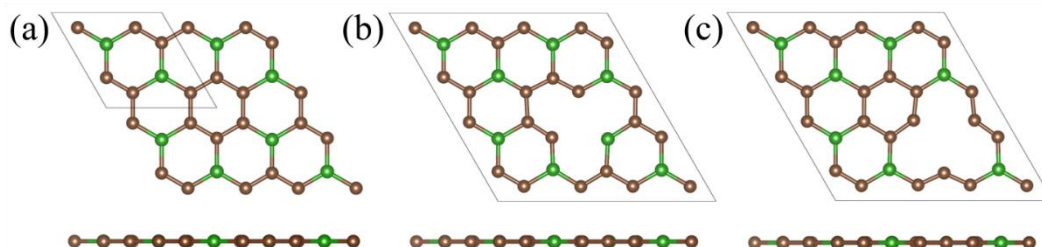

**Fig. S1** Optimized structures of the (a) pristine, (b) C-atom-deficient and (c) B-atom-deficient BC<sub>3</sub> monolayers.

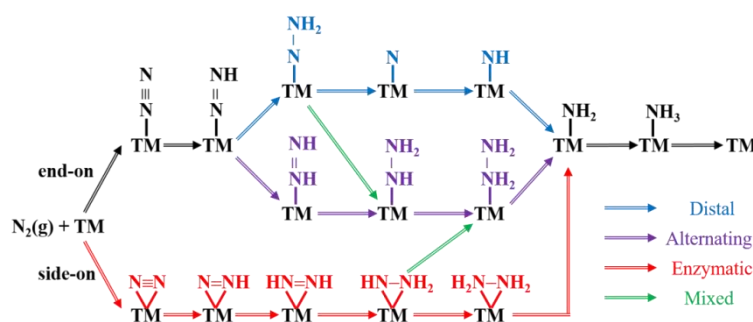

**Fig. S2** Possible reaction mechanism of NRR occurring on TM doped on BC<sub>3</sub>.

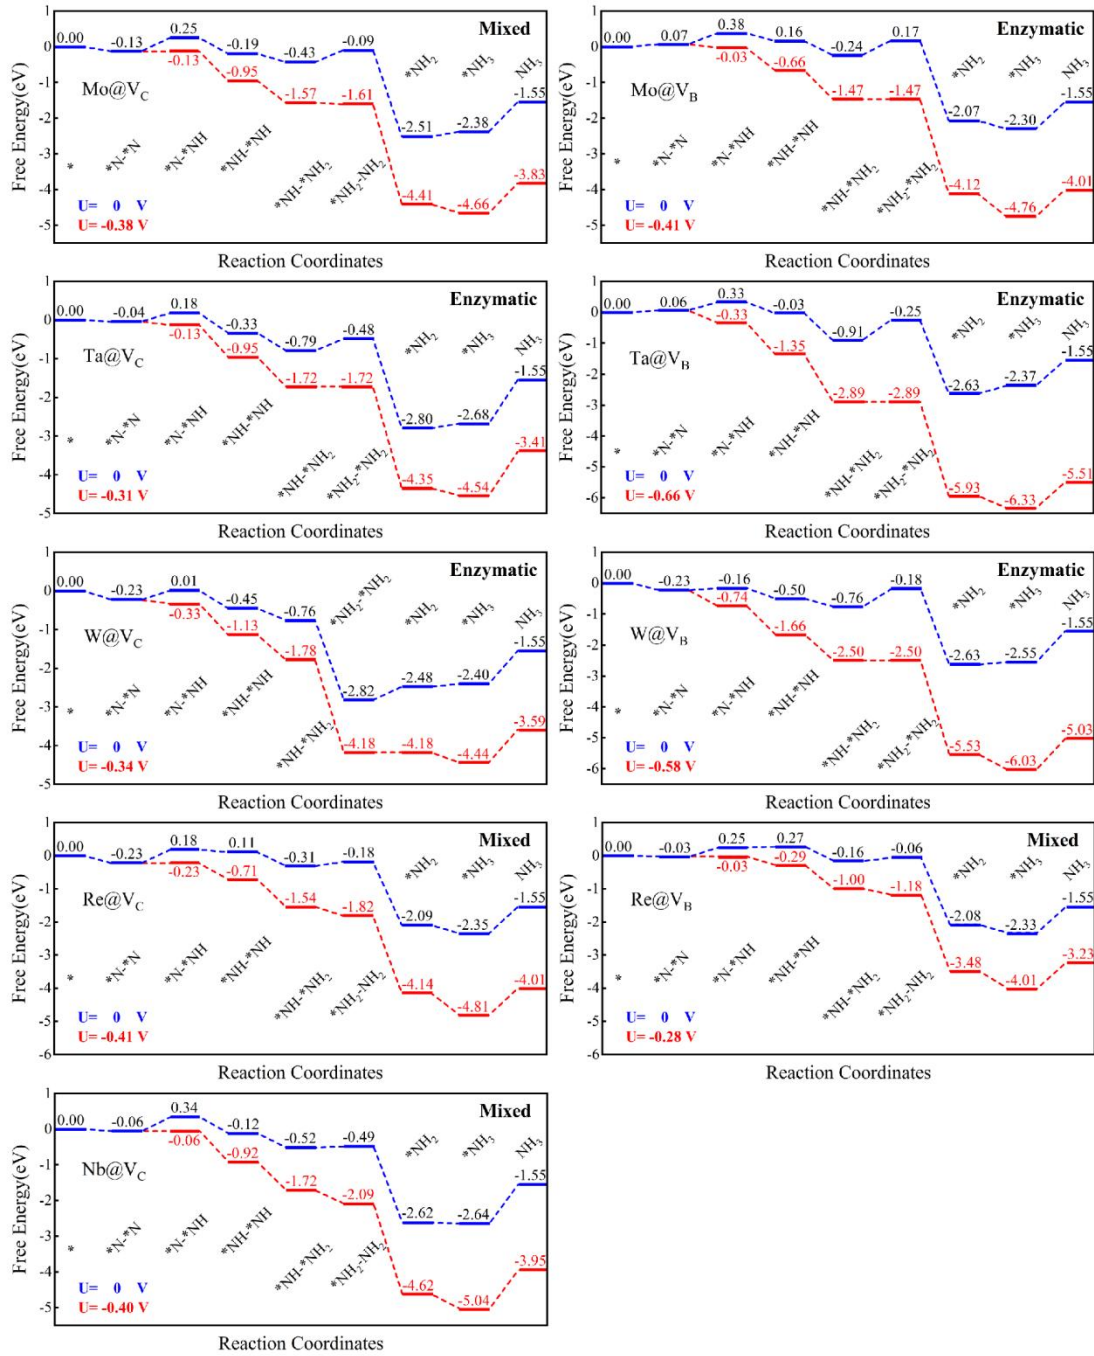

**Fig. S3** Free-energy diagram along enzymatic or mixed path at zero and limiting potential for NRR on 9 candidate SACs.

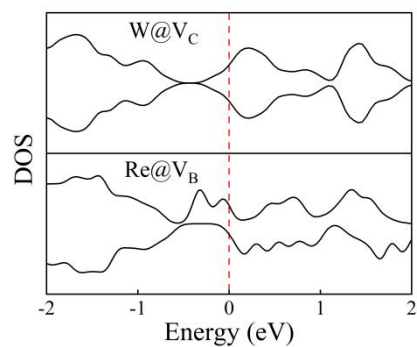

**Fig. S4** DOS of W@V<sub>c</sub> and Re@V<sub>b</sub>.

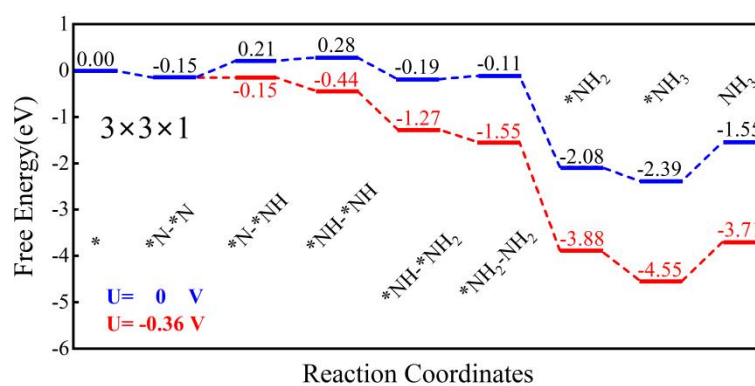

**Fig. S5** Free-energy diagram along mixed path at zero and limiting potential for NRR on Re@V<sub>b</sub> of 3×3.

**Table S1.** Gibbs free energy changes for the first and last protonation steps on 13 candidates capable of adsorbing N<sub>2</sub> in side-on mode

|                   | $\Delta G_{*N-NH}$ (eV) | $\Delta G_{*NH_3}$ (eV) |
|-------------------|-------------------------|-------------------------|
| Y@V <sub>C</sub>  | 0.73                    | -0.18                   |
| Nb@V <sub>C</sub> | 0.40                    | -0.02                   |
| Mo@V <sub>C</sub> | 0.38                    | 0.13                    |
| Mo@V <sub>B</sub> | 0.31                    | -0.23                   |
| Ru@V <sub>C</sub> | 1.39                    | -1.96                   |
| Hf@V <sub>C</sub> | 0.62                    | 0.14                    |
| Ta@V <sub>C</sub> | 0.22                    | 0.12                    |
| Ta@V <sub>B</sub> | 0.27                    | 0.26                    |
| W@V <sub>C</sub>  | 0.24                    | 0.08                    |
| W@V <sub>B</sub>  | 0.07                    | 0.08                    |
| Re@V <sub>C</sub> | 0.41                    | -0.26                   |
| Re@V <sub>B</sub> | 0.28                    | -0.25                   |
| Os@V <sub>C</sub> | 1.29                    | -0.84                   |

**Table S2.** Gibbs free energy changes for the first protonation step on TM@V<sub>C</sub> and TM@V<sub>B</sub> capable of adsorbing N<sub>2</sub> in end-on mode

| TM@V <sub>C</sub> | $\Delta G$ (eV) | TM@V <sub>B</sub> | $\Delta G$ (eV) |
|-------------------|-----------------|-------------------|-----------------|
| Y@V <sub>C</sub>  | 1.15            | Y@V <sub>B</sub>  | 1.16            |
| Hf@V <sub>C</sub> | 1.19            | Hf@V <sub>B</sub> | 1.18            |
| Zr@V <sub>C</sub> | 0.92            | Zr@V <sub>B</sub> | 1.30            |
| Ta@V <sub>C</sub> | 0.53            | Ta@V <sub>B</sub> | 0.74            |
| Nb@V <sub>C</sub> | 0.69            | Nb@V <sub>B</sub> | 0.89            |
| W@V <sub>C</sub>  | 0.58            | W@V <sub>B</sub>  | 0.70            |
| Mo@V <sub>C</sub> | 0.62            | Mo@V <sub>B</sub> | 0.84            |
| Re@V <sub>C</sub> | 0.85            | Re@V <sub>B</sub> | 0.71            |
| Ru@V <sub>C</sub> | 1.52            | Ru@V <sub>B</sub> | 0.84            |
| Os@V <sub>C</sub> | 1.35            | Os@V <sub>B</sub> | 1.46            |
| Rh@V <sub>C</sub> | 1.33            | Rh@V <sub>B</sub> | 1.79            |
| Ir@V <sub>C</sub> | 1.06            | Ir@V <sub>B</sub> | 1.55            |
| Pd@V <sub>C</sub> | 1.68            | Pd@V <sub>B</sub> | 1.75            |
| Pt@V <sub>C</sub> | 1.56            | Pt@V <sub>B</sub> | -               |
| Ag@V <sub>C</sub> | 1.60            | Ag@V <sub>B</sub> | 1.66            |
| Au@V <sub>C</sub> | -               | Au@V <sub>B</sub> | -               |

**Table S3.** The calculated energy (E), zero point energies (ZPE) and entropy of H<sub>2</sub>, N<sub>2</sub> and NH<sub>3</sub> in eV

|                 | E      | ZEP  | TS   |
|-----------------|--------|------|------|
| H <sub>2</sub>  | -6.77  | 0.27 | 0.13 |
| N <sub>2</sub>  | -16.63 | 0.15 | 0.59 |
| NH <sub>3</sub> | -19.55 | 0.89 | 0.60 |
